# Supplementary material for: Straightforward synthesis of enantiopure (R)- and (S)-trifluoroalaninol
Source: Royal Society of Chemistry journal article supplement (doi:10.1039/c0ob00424c), 2010-01-01

## **Straightforward Synthesis of Enantiopure (*R*)- and (*S*)-trifluoroalaninol**

Julien Pytkowicz, Olivier Stéphany, Sinisa Marinkovic, Sébastien Inagaki and Thierry Brigaud\*

*Université de Cergy-Pontoise, Laboratoire SOSCO, F-95000 Cergy-Pontoise, France.*

[thierry.brigaud@u-cergy.fr](mailto:thierry.brigaud@u-cergy.fr)

### **Table of Contents**

|                                                                                                                                          |     |
|------------------------------------------------------------------------------------------------------------------------------------------|-----|
| General information                                                                                                                      | S2  |
| Synthesis and characterization data of products <b>2-7</b> .                                                                             | S3  |
| Copies of <sup>1</sup> H, <sup>13</sup> C and <sup>19</sup> F NMR spectra of compounds ( <i>R</i> )- <b>3</b> and ( <i>S</i> )- <b>3</b> | S8  |
| Copies of <sup>1</sup> H, <sup>13</sup> C and <sup>19</sup> F NMR spectra of compounds ( <i>R</i> )- <b>4</b> and ( <i>S</i> )- <b>4</b> | S11 |
| Copies of <sup>1</sup> H, <sup>13</sup> C and <sup>19</sup> F NMR spectra of compounds ( <i>R</i> )- <b>7</b> and ( <i>S</i> )- <b>7</b> | S16 |

**General informations**

Unless otherwise mentioned, all the reagents were purchased from commercial source. All glassware was dried in an oven prior to use. Ether and THF were distilled under nitrogen from sodium/benzophenone prior to use.  $\text{CH}_2\text{Cl}_2$  was distilled under nitrogen from  $\text{CaH}_2$  prior to use.  $^1\text{H}$  NMR (400,00 MHz or 250.00 MHz),  $^{13}\text{C}$  NMR (100,50 MHz or 62.90 MHz) and  $^{19}\text{F}$  NMR (376,20 MHz or 235.36 MHz) were measured on a JEOL 400 spectrometer or a BRÜCKER ADVANCE 250 DPX. Chemical shifts of  $^1\text{H}$  NMR were expressed in parts per million downfield from tetramethylsilane ( $\delta = 0$  ppm) in  $\text{CDCl}_3$ . Chemical shifts of  $^{13}\text{C}$  NMR were expressed in parts per million downfield from  $\text{CDCl}_3$  as internal standard ( $\delta = 77.0$  ppm). Chemical shifts of  $^{19}\text{F}$  NMR were expressed in parts per million downfield from  $\text{C}_6\text{F}_6$  as internal standard ( $\delta = -164.9$  ppm). Coupling constants are reported in hertz. Column chromatography was performed on Merck Kieselgel 60 (0,040–0,063 mm), employing mixture of specified solvent as eluent. Thin-layer chromatography (TLC) was performed on Merck silica gel (Merck 60 PF<sub>254</sub>) plates. Silica TLC plates were visualized under UV light, by a 10% solution of phosphomolybdic acid in ethanol followed by heating. Gas chromatography was performed on Agilent 6890 N (detector with ionization of flame) and with a polydimethylsiloxane column HP ultra I (25 m x 3.2 mm x 0.52  $\mu\text{m}$  thickness of layer). Mass spectra (MS) were obtained on a GC/MS apparatus HP 5973 MSD with an HP 6890 Series GC. Ionization was obtained by electronic impact (EI 70 eV). Infrared spectra (IR) were obtained by Fourier-transformation on BRÜCKER TENSOR 27, wave numbers are given in  $\text{cm}^{-1}$ . Elemental analyses were performed by the CNRS analysis central service. Optical rotations are reported as their specific rotations at 25 °C in g/100 mL, determined using a JASCO P1010 polarimeter. Melting points were obtained on a Büchi apparatus and are uncorrected.

**Synthesis of  $\alpha$ -Tfm-aminonitriles:**  $\alpha$ -Tfm-aminonitriles (*R*)-**2** and (*S*)-**2** were prepared according to our previously reported procedure.<sup>1</sup>

**2-((1*R*)-2-hydroxy-1-phenylethylamino)-3,3,3-trifluoromethylpropanoate (**3**):** To a 83:17 mixture of aminonitriles (*R*)-**2** and (*S*)-**2** (4.07 g, 16.7 mmol, 1 equiv) was added dropwise a solution of saturated hydrochloric acid in methanol (200 mL) at 0°C. The reaction was refluxed for 5 days, cooled down to room temperature, poured into a saturated solution of sodium bicarbonate (250 mL) and concentrated under reduced pressure. The crude material was purified by flash chromatography (80/20 cyclohexane/ethyl acetate) to afford a 67:33 diastereomeric mixture of (*R*)-**3** and (*S*)-**3** as a yellow oil (3.92 g, 85%). Pure (*R*)-**3** and (*S*)-**3** samples were isolated for analytical studies. Major diastereomer (*R*)-**3**:  $[\alpha]_D -141.3$  (*c* 1.3, CHCl<sub>3</sub>). IR (neat): 3330, 1746, 1128, 701 cm<sup>-1</sup>. <sup>1</sup>H NMR (250 MHz, CDCl<sub>3</sub>):  $\delta$  2.26 (s, 1H, OH), 2.96 (s, 1H, NH), 3.47-3.72 (m, 4H), 3.74 (s, 3H, CH<sub>3</sub>O), 7.18-7.29 (m, 5H, Ar) ppm. <sup>13</sup>C NMR (62.9 MHz, CDCl<sub>3</sub>):  $\delta$  52.3 (s, CH<sub>3</sub>), 60.3 (q, *J* = 30.1 Hz, CH), 62.0 (s, CH), 66.7 (s, CH<sub>2</sub>), 122.4 (q, *J* = 281.0 Hz, CF<sub>3</sub>), 126.6 (s, Ar), 127.3 (s, Ar), 128.0 (s, Ar), 137.3 (s, Ar), 167.7 (s, CO) ppm. <sup>19</sup>F NMR (235 MHz, CDCl<sub>3</sub>):  $\delta$  -73.2 (d, *J* = 7.1 Hz, 3F, CF<sub>3</sub>) ppm. MS (EI): *m/z* (%) = 246 [M<sup>+</sup>-OMe] (100), 186, 159, 118. Minor diastereomer (*S*)-**3**:  $[\alpha]_D -24.8$  (*c* 2.2, CHCl<sub>3</sub>). IR (neat): 3348, 1747, 1122, 700 cm<sup>-1</sup>. <sup>1</sup>H NMR (250 MHz, CDCl<sub>3</sub>):  $\delta$  2.52 (s, 1H, OH), 2.72 (s, 1H, NH), 3.55-3.81 (m, 3H), 3.63 (s, 3H, CH<sub>3</sub>O), 3.90 (dd, *J* = 8.4 Hz, *J* = 4.0 Hz, CH-Ph), 7.24-7.36 (m, 5H, Ar) ppm. <sup>13</sup>C NMR (62.9 MHz, CDCl<sub>3</sub>):  $\delta$  52.6 (s, CH<sub>3</sub>), 60.3 (q, *J* = 29.8 Hz, CH), 63.5 (s, CH), 66.4 (s, CH<sub>2</sub>), 123.6 (q, *J* = 283.4 Hz, CF<sub>3</sub>), 127.2 (s, Ar), 127.8 (s, Ar), 128.6 (s, Ar),

---

(1) F. Huguenot and T. Brigaud, *J. Org. Chem.*, 2006, **71**, 7075–7078.

138.8 (s, Ar), 167.5 (s, CO) ppm.  $^{19}\text{F}$  NMR (235 MHz,  $\text{CDCl}_3$ ):  $\delta$  -72.8 (d,  $J = 7.1$  Hz, 3F,  $\text{CF}_3$ ) ppm. MS (EI):  $m/z$  (%) = 246 [ $\text{M}^+$ -OMe] (100), 186, 159, 118.

**2-((1*R*)-2-hydroxy-1-phenylethylamino)-3,3,3-trifluoropropan-1-ol (4):** To a 67:33 solution of (*R*)-**3** and (*S*)-**3** (1.38 g, 4.98 mmol) in anhydrous diethyl ether (75 mL) was added lithium aluminum hydride (754 mg, 19.9 mmol, 4 equiv) carefully at 0°C. The reaction was stirred under argon atmosphere at room temperature for 24 hours and quenched with successive addition of water (4 mL), sodium hydroxide (15% W, 4 mL) and water (8 mL). The white precipitate was filtered over a pad of celite and washed with diethyl ether (100 mL). The filtrate was dried over magnesium sulfate, concentrated under reduced pressure, purified by flash chromatography (70/30 cyclohexane/ethyl acetate) to afford pure (*R*)-**4** (744 mg, 60%) and (*S*)-**4** (310 mg, 25%) as white solids. Major diastereomer (*R*)-**4**: mp = 65-67°C.  $[\alpha]_{\text{D}} -68.1$  ( $c$  2.0,  $\text{CHCl}_3$ ). IR (neat): 3328 (b), 2248, 2163 (w), 1456, 1388, 1280, 1247, 1129, 1079, 1019, 923, 758, 727, 698, 603  $\text{cm}^{-1}$ .  $^1\text{H}$  NMR (400 MHz,  $\text{CDCl}_3$ ):  $\delta$  2.50 (s, 1H, NH), 3.08 (qdd,  $J = 7.9$  Hz,  $J = 4.1$  Hz,  $J = 3.7$  Hz, 1H, CH- $\text{CF}_3$ ), 3.61 (dd,  $J = 10.5$  Hz,  $J = 9.1$  Hz, 1H,  $\text{CH}_2$ -OH), 3.73 (dd,  $J = 12.0$  Hz,  $J = 5.1$  Hz, 1H,  $\text{CH}_2$ -OH), 3.80 (dd,  $J = 10.5$  Hz,  $J = 3.7$  Hz, 1H,  $\text{CH}_2$ -OH), 3.90 (dd,  $J = 12.0$  Hz,  $J = 3.7$  Hz, 1H,  $\text{CH}_2$ -OH), 4.03 (dd,  $J = 9.1$  Hz,  $J = 3.7$  Hz, 1H, CHPh- $\text{CH}_2$ ), 4.13 (bs, 1H, OH), 4.25 (bs, 1H, OH), 7.20-7.50 (m, 5H, Ar) ppm.  $^{13}\text{C}$  NMR (100.5 MHz,  $\text{CDCl}_3$ ):  $\delta$  57.7 (s,  $\text{CH}_2$ ), 57.8 (q,  $J = 26.8$  Hz, CH- $\text{CF}_3$ ), 61.8 (s, CH), 67.3 (s,  $\text{CH}_2$ ), 125.6 (q,  $J = 282.8$  Hz,  $\text{CF}_3$ ), 127.5 (s, Ar), 128.0 (s, Ar), 128.7 (s, Ar), 139.1 (s, Ar) ppm.  $^{19}\text{F}$  NMR (376.2 MHz,  $\text{CDCl}_3$ ):  $\delta$  -76.7 (d,  $J = 7.9$  Hz, 3F,  $\text{CF}_3$ ) ppm. Anal. Calcd for  $\text{C}_{11}\text{H}_{14}\text{F}_3\text{NO}_2$  (249.10): C, 53.01; H, 5.66; N, 5.62. found: C, 52.82; H, 5.70; N, 5.49. Minor diastereomer (*S*)-**4**: mp = 75-80°C.  $[\alpha]_{\text{D}} -77.0$  ( $c$  2.0,  $\text{CHCl}_3$ ). IR (neat): 3234 (b), 2875, 2162 (w), 1455, 1365, 1284, 1237, 1123, 1080, 1031, 993, 924, 753, 727, 695, 632  $\text{cm}^{-1}$ .  $^1\text{H}$  NMR (250 MHz,  $\text{CDCl}_3$ ):  $\delta$  2.20-2.60 (bs, 3H, NH, OH, OH), 3.08 (qdd,  $J = 7.3$  Hz,  $J = 4.6$  Hz,  $J = 2.7$  Hz, 1H, CH- $\text{CF}_3$ ), 3.53-3.70 (m, 3H,  $\text{CH}_2$ -OH), 3.72

(dd,  $J = 10.9$  Hz,  $J = 4.0$  Hz, 1H, CH<sub>2</sub>-OH), 4.12 (dd,  $J = 8.7$  Hz,  $J = 4.0$  Hz, 1H, CHPh-CH<sub>2</sub>), 7.20-7.40 (m, 5H, Ar) ppm. <sup>13</sup>C NMR (62.9 MHz, CDCl<sub>3</sub>):  $\delta$  57.8 (q,  $J = 26.4$  Hz, CH-CF<sub>3</sub>), 60.1 (s, 2C, CH<sub>2</sub>, CH), 67.9 (s, CH<sub>2</sub>), 126.6 (q,  $J = 282.1$  Hz, CF<sub>3</sub>), 128.0 (s, Ar), 128.7 (s, Ar), 129.3 (s, Ar), 139.3 (s, Ar) ppm. <sup>19</sup>F NMR (376.2 MHz, CDCl<sub>3</sub>):  $\delta$  -75.5 (d,  $J = 7.2$  Hz, 3F, CF<sub>3</sub>) ppm.

**(*E*)-1-Ethoxycarbonyl-2,2,2-trifluoroethylidene-((1*R*)-2-*tert*-butyldimethylsilyloxy-1-phenylethylamine (**5**):**

Multigram quantity of **5** was prepared using our already reported procedure.<sup>2</sup>

**Synthesis of aminodiols (*R*)-**4** and (*S*)-**4** from the imine **5**:**

To a solution of imine **5** (403 mg, 1 mmol) in anhydrous diethyl ether (25 mL) was added lithium aluminum hydride (152 mg, 4 mmol, 4 equiv) carefully at 0°C. The reaction was stirred under argon atmosphere at reflux for 24 hours. The reaction mixture was cool down to room temperature and quenched with successive addition of water (0.16 mL), sodium hydroxide (15% W, 0.16 mL) and water (0.48 mL). The white precipitate was filtered over a pad of celite and washed with diethyl ether. The filtrate was dried over magnesium sulfate, concentrated under reduced pressure, purified by flash chromatography (70/30 cyclohexane/ethyl acetate) to afford a 72:28 diastereomeric mixture of (*S*)-**4** and (*R*)-**4** (179 mg, 73%).

**(4*R*)-2-carboethoxy-2-trifluoromethyl-4-phenyl-1,3-oxazolidine (**6**):**

Multigram quantity of (**6**) was prepared using our already reported procedure.<sup>2,3</sup>

---

(2) G. Chaume, M.-C. Van Severen, S. Marinkovic and T. Brigaud, *Org. Lett.*, 2006, **8**, 6123–6126.

(3) (a) C. Caupene, G. Chaume, L. Ricard and T. Brigaud, *Org. Lett.*, 2009, **11**, 209–212, (b) G. Chaume, M.-C. Van Severen, L. Ricard and T. Brigaud, *J. Fluorine Chem.*, 2008, **129**, 1104–

**Synthesis of aminodiols (*R*)-4 and (*S*)-4 from the oxazolidines 6:**

To a 83:17 mixture of **6** (1.0 g, 3.45 mmol) in anhydrous diethyl ether (50 mL) was added lithium aluminum hydride (524 mg, 13.8 mmol, 4 equiv) carefully at 0°C. The reaction was stirred under argon atmosphere at room temperature for 18 hours and quenched with successive addition of water (0.6 mL), sodium hydroxide (15% W, 0.6 mL) and water (1.8 mL). The white precipitate was filtered over a pad of celite and washed with diethyl ether (80 mL). The filtrate was dried over magnesium sulfate, concentrated under reduced pressure, purified by flash chromatography (70/30 to 50/50 cyclohexane/ethyl acetate) to afford pure (*R*)-**4** (509 mg, 60%) and (*S*)-**4** (211 mg, 24%) as white solids.

**(*R*)-Trifluoroalaninol hydrochloride salt ((*R*)-7):**

To a solution of (*R*)-**4** (400 mg, 1.6 mmol) in methanol (4 mL) was added successively palladium hydroxide (63 mg, 20% W, 0.08 mmol, 5 mol%) and a 3N hydrochloride solution (2.4 mL). The mixture was placed in an autoclave under hydrogen pressure (5.5 bar) and vigorously stirred for 48 hours. The suspension was filtered and evaporated to dryness under reduced pressure. The solid was washed with diethyl ether (3x3 mL) to remove 2-phenylethanol and evaporated under reduced pressure to give pure hydrochloride salt of (*R*)-**7** (202 mg, 76%). mp = 202°C.  $[\alpha]_D^{20} +8.1$  (*c* 0.8, EtOH). IR (neat): 3354, 2913, 2490, 1584, 1156, 1143  $\text{cm}^{-1}$ .  $^1\text{H}$  NMR (400 MHz, MeOH):  $\delta$  3.83 (A from ABX,  $J_{AB} = 13.5$  Hz,  $J_{AX} = 5.0$  Hz, 1H,  $\text{CH}_2\text{-OH}$ ), 3.86 (B from ABX,  $J_{AB} = 13.5$  Hz,  $J_{BX} = 4.6$  Hz, 1H,  $\text{CH}_2\text{-OH}$ ), 4.02 (qdd,  $J_{\text{HF}} = 7.6$  Hz,  $J_{AX} = 5.0$  Hz,  $J_{BX} = 4.6$  Hz, 1H,  $\text{CH-CF}_3$ ) ppm.  $^{13}\text{C}$  NMR (62.9 MHz, MeOH):  $\delta$  55.2 (q,  $J = 30.2$  Hz,  $\text{CH-CF}_3$ ), 58.0 (s,  $\text{CH}_2$ ), 125.3 (q,  $J = 280.8$  Hz,  $\text{CF}_3$ ) ppm.  $^{19}\text{F}$  NMR (376.2 MHz,  $\text{CDCl}_3$ ):  $\delta$  -75.7

---

1109; (c) G. Chaume, N. Lensen, C. Caupene and T. Brigaud, *Eur. J. Org. Chem.*, 2009, 5717–5724.

(d,  $J = 7.6$  Hz, 3F, CF<sub>3</sub>) ppm. Anal. Calcd for C<sub>3</sub>H<sub>7</sub>ClF<sub>3</sub>NO (165.02): C, 21.77; H, 4.26; N, 8.46.  
found: C, 21.35, H, 4.22, N, 7.85.

**(S)-Trifluoroalaninol hydrochloride salt ((S)-7):**

Obtained from (S)-4 (185 mg, 0.74 mmol), following the procedure used for (R)-7, as a white solid (110 mg, 90%). (S)-7:  $[\alpha]_D -8.0$  ( $c$  0.6, EtOH). Other spectral and analytical properties are strictly identical to (R)-7.

**<sup>19</sup>F NMR: crude mixture of (R)-3 and (S)-3**

os 11 brut

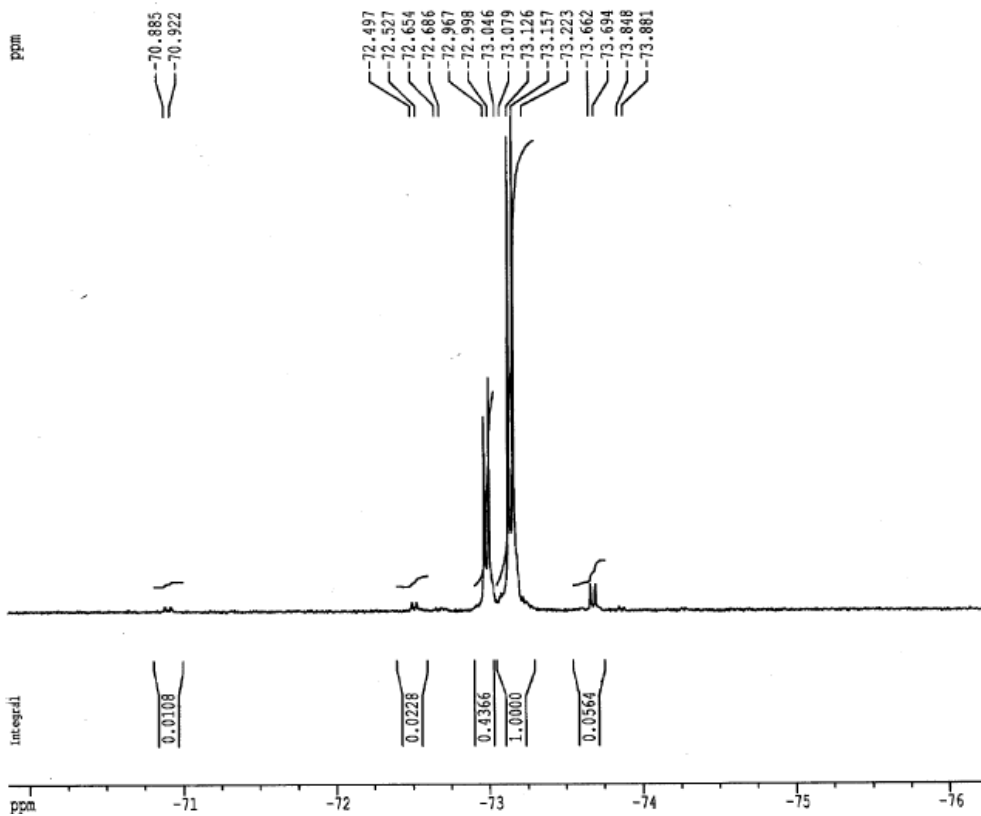

## Current Data Parameters

NAME os  
EXPNO 390  
PROCNO 1

## F2 - Acquisition Parameters

Date\_ 20041021  
Time 17.21  
INSTRUM spect  
PROBHD 5 mm QNP 1H  
PULPROG zgpg30  
TD 131072  
SOLVENT C6D6  
NS 16  
DS 4  
SWH 56497.176 Hz  
FIDRES 0.431039 Hz  
AQ 1.1600372 sec  
RG 7298.2  
DM 8.850 usec  
DE 6.50 usec  
TE 300.0 K  
D1 1.00000000 sec

## CHANNEL f1

NUC1 19F  
P1 19.50 usec  
PL1 -4.00 dB  
SFO1 235.3339190 MHz

## F2 - Processing parameters.

SI 65536  
SF 235.3574550 MHz  
WDW EM  
SSB 0  
LB 0.30 Hz  
GB 0  
PC 1.00

## 1D NMR plot parameters

CX 20.00 cm  
F1P -69.857 ppm  
F1 -16441.33 Hz  
F2P -76.271 ppm  
F2 -17950.85 Hz  
PPHMC 0.32069 ppm/cm  
HZCM 75.47601 Hz/cm

**<sup>1</sup>H NMR of (R)-3**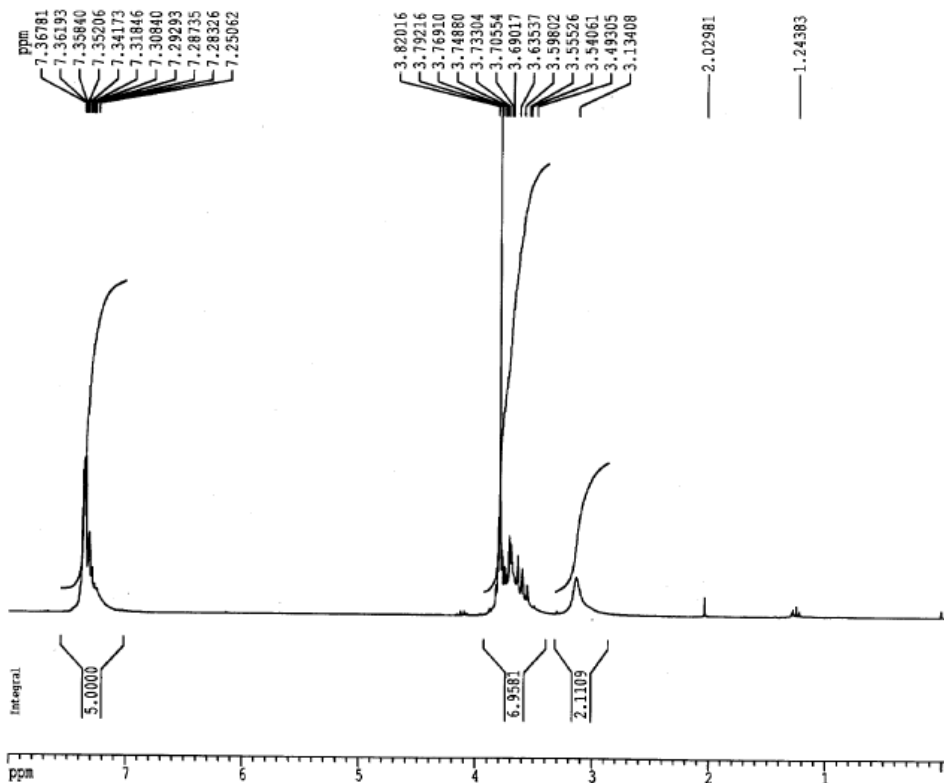

## Current Data Parameters

NAME qc  
EXPNO 158  
PROCNO 1

## F2 - Acquisition Parameters

Date\_ 20041118  
Time 17.04  
INSTRUM spect  
PROBHD 5 mm QNP 1H  
PULPROG zg30  
TD 65536  
SOLVENT CDCl3  
NS 16  
DS 2  
SWH 5175.983 Hz  
FIDRES 0.078979 Hz  
AQ 6.3508277 sec  
RG 71.8  
DM 96.600 usec  
DE 6.50 usec  
TE 300.0 K  
D1 1.00000000 sec

## CHANNEL f1

NUC1 1H  
P1 13.50 usec  
PL1 -6.00 dB  
SFO1 250.1315447 MHz

## F2 - Processing parameters

SI 32768  
SF 250.1300109 MHz  
WDW no  
SSB 0  
LB 0.00 Hz  
GB 0  
PC 1.00

## 1D NMR plot parameters

CX 20.00 cm  
F1P 8.000 ppm  
F1 2001.04 Hz  
F2P -0.100 ppm  
F2 -25.01 Hz  
PPHMC 0.40500 ppm/cm  
HZCM 101.30266 Hz/cm



<sup>13</sup>C NMR of (R)-3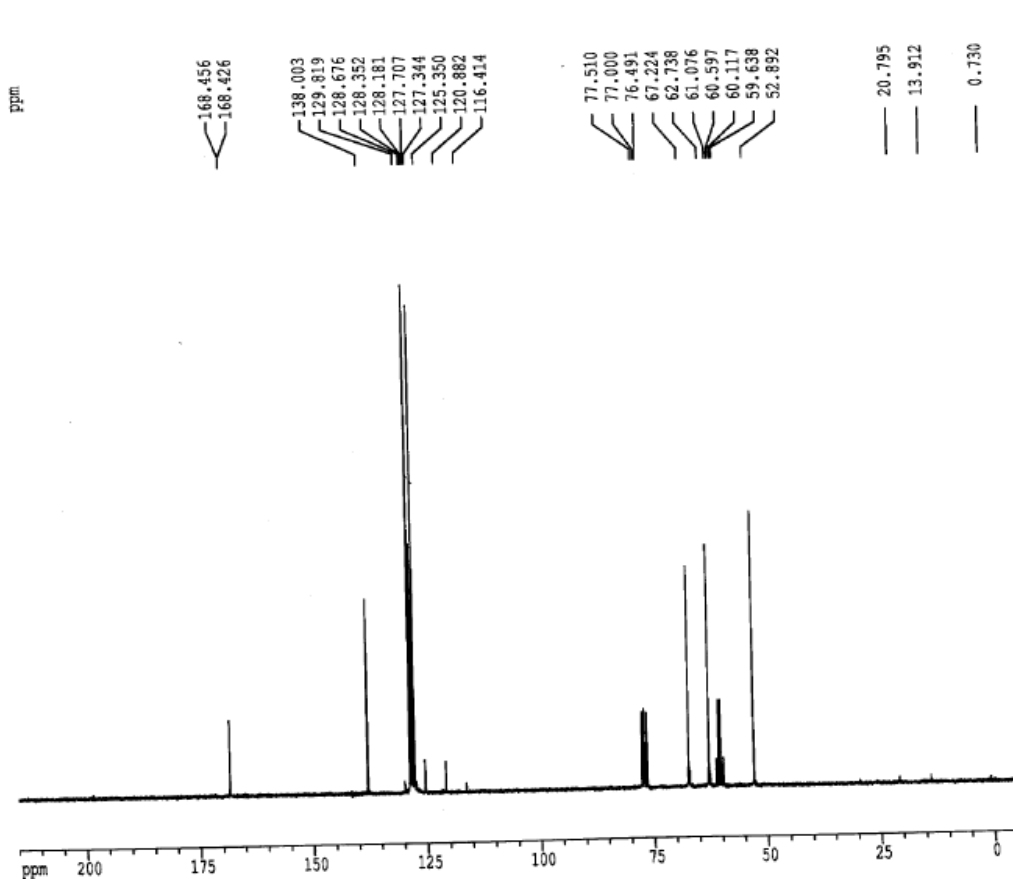

```

Current Data Parameters
NAME          qc
EXPNO         180
PROCNO        1

F2 - Acquisition Parameters
Date_         20041118
Time          19.34
INSTRUM       spect
PROBHD        5 mm QNP 1H
PULPROG       zgpg30
TD            65536
SOLVENT       CDCl3
NS            1024
DS            4
SWH           15723.271 Hz
FIDRES        0.239918 Hz
AQ            2.0849948 sec
RG            8192
DM            31.880 usec
DE            6.50 usec
TE            300.0 K
D1            1.00000000 sec
d11           0.03000000 sec
d12           0.00002000 sec

----- CHANNEL f1 -----
NUC1          13C
P1            6.00 usec
PL1           -6.00 dB
SFO1         62.9021320 MHz

----- CHANNEL f2 -----
CPDPRG2       waltz16
NUC2          1H
PCPD2         100.00 usec
PL2           -6.00 dB
PL12          15.00 dB
PL13          15.00 dB
SFO2         250.1310005 MHz

F2 - Processing parameters
SI            32768
SF            62.8952474 MHz
WDW           EM
SSB           0
LB            1.00 Hz
GB            0
PC            1.40

1D NMR plot parameters
CX            20.00 cm
F1P           215.000 ppm
F1            13522.48 Hz
F2P           -5.000 ppm
F2            -314.48 Hz
PPMCM         11.00000 ppm/cm
HZCM          691.64772 Hz/cm

```

<sup>19</sup>F NMR of (R)-3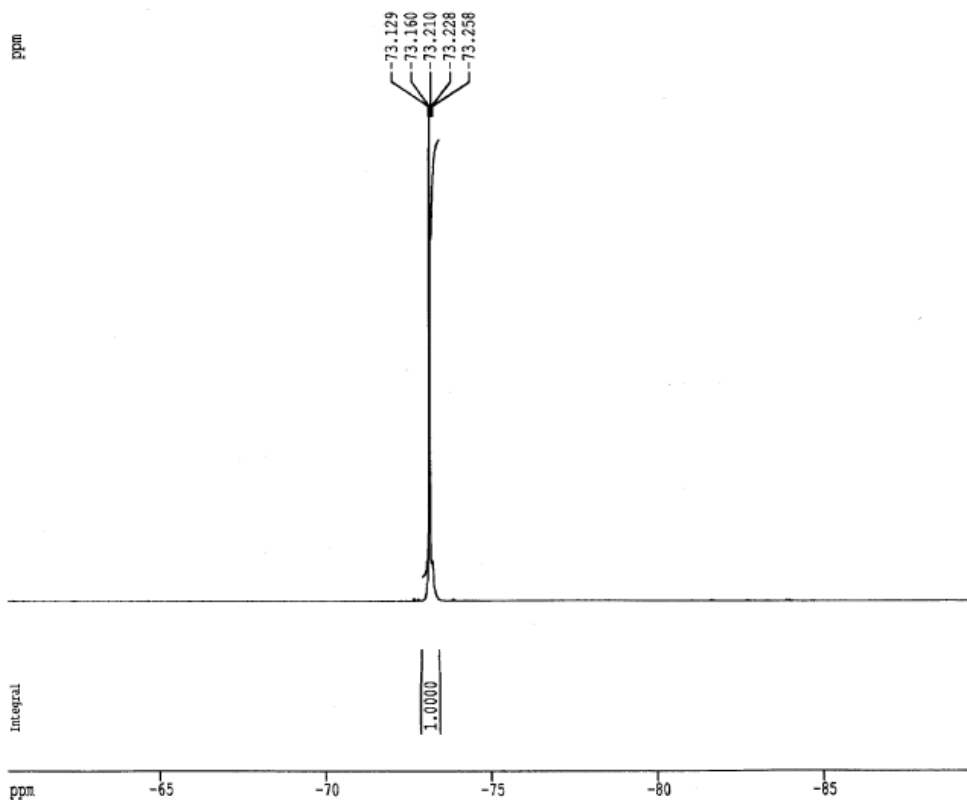

```

Current Data Parameters
NAME          qc
EXPNO         157
PROCNO        1

F2 - Acquisition Parameters
Date_         20041118
Time          17.01
INSTRUM       spect
PROBHD        5 mm QNP 1H
PULPROG       zgfgm
TD            131072
SOLVENT       C6D6
NS            16
DS            4
SWH           56497.176 Hz
FIDRES        0.431039 Hz
AQ            1.1600372 sec
RG            1024
DM            8.850 usec
DE            6.50 usec
TE            300.0 K
D1            1.00000000 sec

----- CHANNEL f1 -----
NUC1          19F
P1            19.50 usec
PL1           -4.00 dB
SFO1         235.3339190 MHz

F2 - Processing parameters
SI            65536
SF            235.3574550 MHz
WDW           EM
SSB           0
LB            0.30 Hz
GB            0
PC            1.00

1D NMR plot parameters
CX            20.00 cm
F1P           -60.421 ppm
F1            -14220.60 Hz
F2P           -89.464 ppm
F2            -21055.91 Hz
PPMCM         1.45211 ppm/cm
HZCM          341.76559 Hz/cm

```

<sup>1</sup>H NMR of (S)-3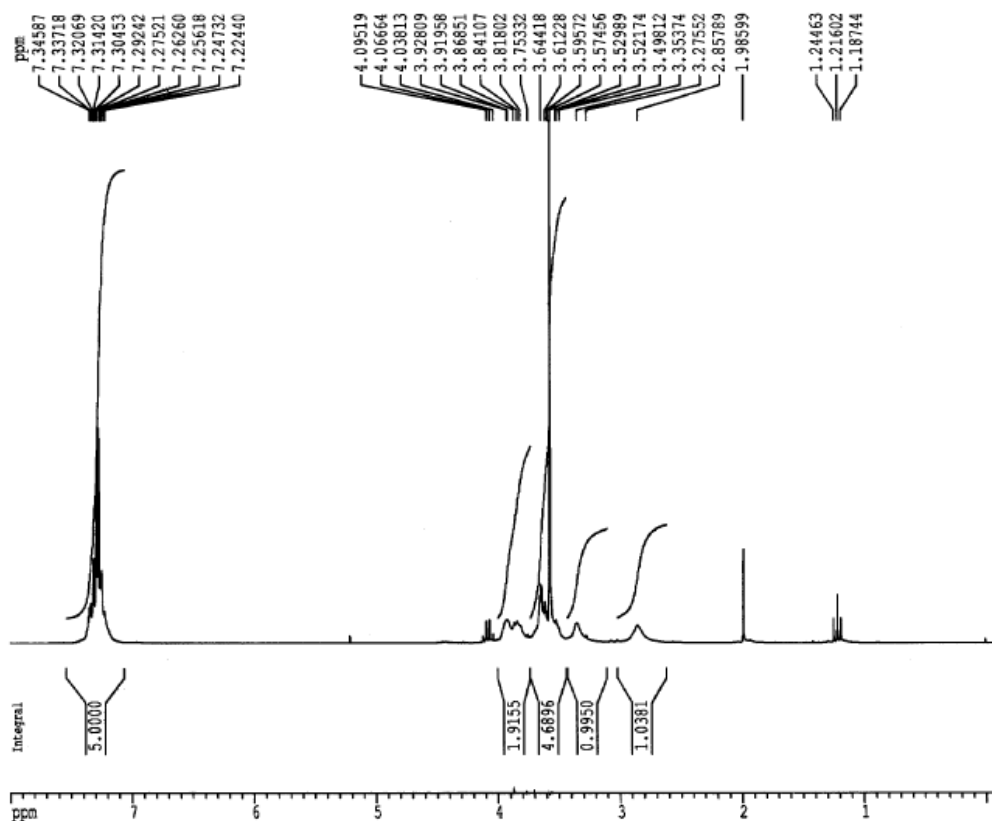

## Current Data Parameters

NAME qc  
EXPRO 156  
PROCNO 1

## F2 - Acquisition Parameters

Date\_ 20041118  
Time 16.56  
INSTRUM spect  
PROBHD 5 mm QNP 1H  
PULPROG zg30  
TD 65536  
SOLVENT CDCl3  
NS 16  
DS 2  
SWE 5175.983 Hz  
FIDRES 0.078979 Hz  
AQ 6.3308277 sec  
RG 45.3  
DM 96.600 usec  
DE 6.50 usec  
TE 300.0 K  
D1 1.00000000 sec

## CHANNEL f1

NUC1 1H  
P1 13.50 usec  
PL1 -6.00 dB  
SFO1 250.1315447 MHz

## F2 - Processing parameters

SI 32768  
SF 250.1300044 MHz  
WDW no  
SSB 0  
LB 0.00 Hz  
GB 0  
PC 1.00

## 1D NMR plot parameters

CX 20.00 cm  
F1P 8.000 ppm  
F1 2001.04 Hz  
F2P -0.100 ppm  
F2 -25.01 Hz  
PPMCM 0.40500 ppm/cm  
HZCM 101.30266 Hz/cm

<sup>13</sup>C NMR of (S)-3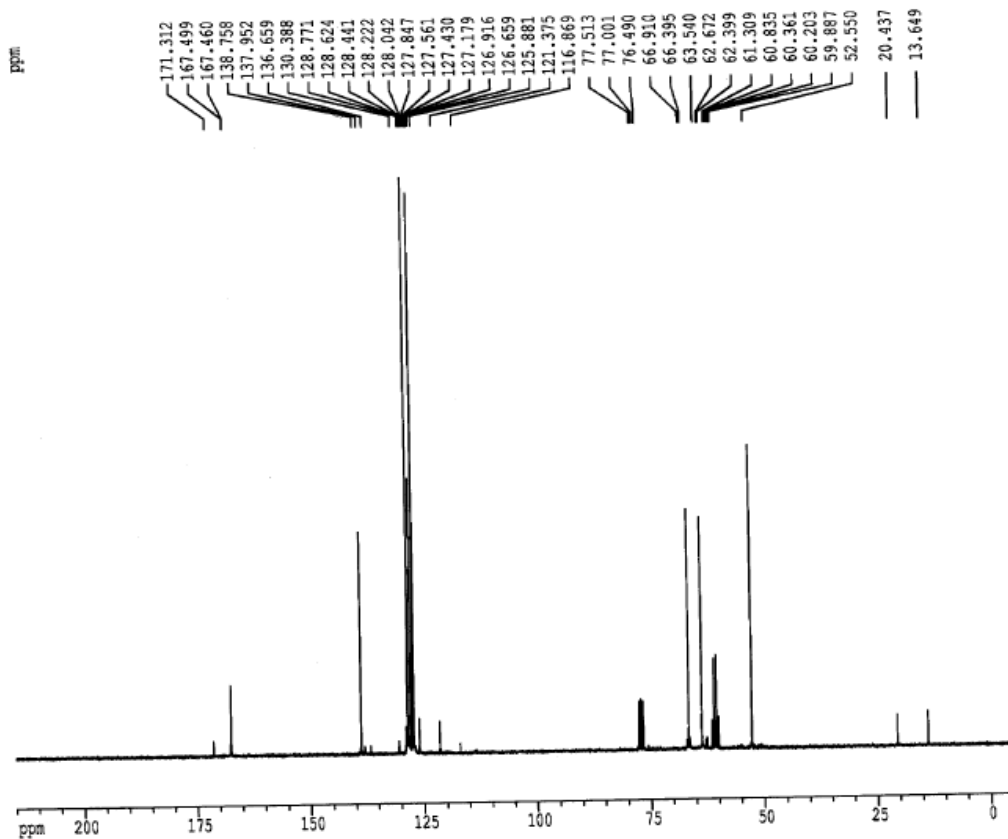

## Current Data Parameters

NAME qc  
EXPRO 170  
PROCNO 1

## F2 - Acquisition Parameters

Date\_ 20041119  
Time 8.42  
INSTRUM spect  
PROBHD 5 mm QNP 1H  
PULPROG zgpg30  
TD 65536  
SOLVENT CDCl3  
NS 608  
DS 4  
SWE 15723.271 Hz  
FIDRES 0.239918 Hz  
AQ 2.0840348 sec  
RG 32.58  
DM 31.400 usec  
DE 6.50 usec  
TE 300.0 K  
D1 1.00000000 sec  
D11 0.03000000 sec  
D12 0.00002000 sec

## CHANNEL f1

NUC1 13C  
P1 6.00 usec  
PL1 -6.00 dB  
SFO1 62.9021320 MHz

## CHANNEL f2

CPDPRG2 waltz16  
NUC2 1H  
PCPD2 100.00 usec  
PL2 -6.00 dB  
PL12 15.00 dB  
PL13 15.00 dB  
SFO2 250.1310005 MHz

## F2 - Processing parameters

SI 32768  
SF 62.8952560 MHz  
WDW EM  
SSB 0  
LB 1.00 Hz  
GB 0  
PC 1.40

## 1D NMR plot parameters

CX 20.00 cm  
F1P 215.000 ppm  
F1 13522.48 Hz  
F2P -5.000 ppm  
F2 -314.48 Hz  
PPMCM 11.00000 ppm/cm  
HZCM 691.84784 Hz/cm

$^{19}\text{F}$  NMR of (*S*)-3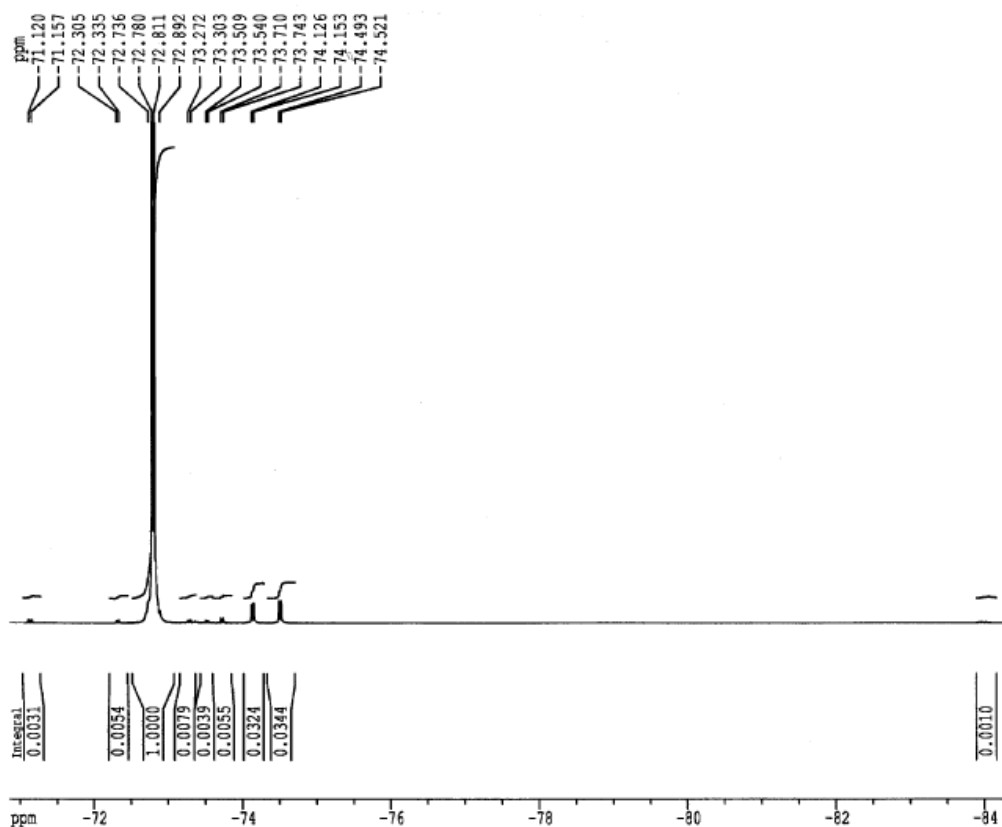

Current Data Parameters  
 NAME qc  
 EXPNO 155  
 PROCNO 1

F2 - Acquisition Parameters  
 Date\_ 2004118  
 Time 16.53  
 INSTRUM spect  
 PROBED 5 mm QNP 1H  
 PULPROG zgpg30  
 TD 131072  
 SOLVENT CDCl3  
 NS 16  
 DS 4  
 SWH 56497.176 Hz  
 FIDRES 0.431039 Hz  
 AQ 1.1600372 sec  
 RG 512  
 DW 8.850 usec  
 DE 6.50 usec  
 TE 300.0 K  
 D1 1.00000000 sec

CHANNEL f1  
 NUC1 19F  
 P1 19.50 usec  
 PL1 -4.00 dB  
 SFO1 235.3339190 MHz

F2 - Processing parameters  
 SI 65536  
 SF 235.3574550 MHz  
 WDW EM  
 SSB 0  
 LB 0.30 Hz  
 GB 0  
 PC 1.00

1D NMR plot parameters  
 CX 20.00 cm  
 FIP -70.857 ppm  
 F1 -16676.70 Hz  
 F2P -84.257 ppm  
 F2 -19839.36 Hz  
 FFCM 0.67201 ppm/c  
 HSCM 158.16312 Hz/cm

 $^1\text{H}$  NMR: crude mixture of (*R*)-4 and (*S*)-4 from imine 5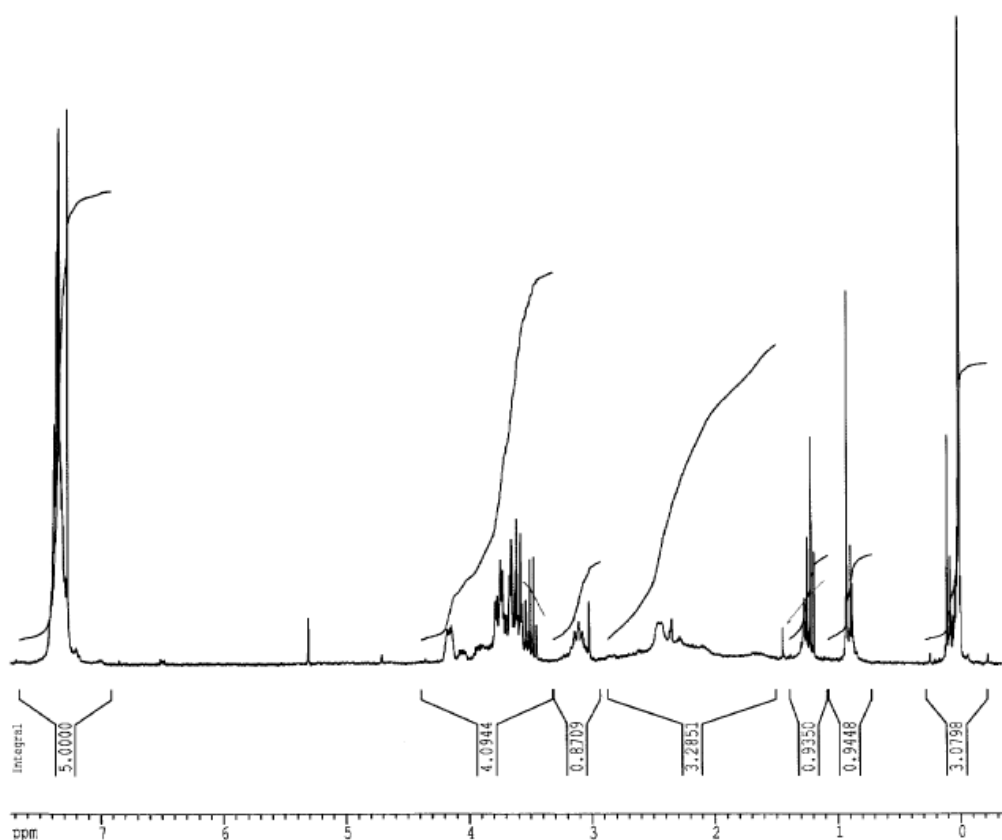

Current Data Parameters  
 NAME mms  
 EXPNO 2160  
 PROCNO 1

F2 - Acquisition Parameters  
 Date\_ 20040226  
 Time 18.04  
 INSTRUM spect  
 PROBED 5 mm QNP 1H  
 PULPROG zg30  
 TD 65536  
 SOLVENT CDCl3  
 NS 16  
 DS 2  
 SWH 5175.983 Hz  
 FIDRES 0.078979 Hz  
 AQ 6.3308277 sec  
 RG 912.3  
 DW 96.600 usec  
 DE 6.50 usec  
 TE 300.0 K  
 D1 1.00000000 sec

CHANNEL f1  
 NUC1 1H  
 P1 13.50 usec  
 PL1 -6.00 dB  
 SFO1 250.1315447 MHz

F2 - Processing parameters  
 SI 32768  
 SF 250.1300048 MHz  
 WDW EM  
 SSB 0  
 LB 0.30 Hz  
 GB 0  
 PC 1.00

1D NMR plot parameters  
 CX 20.00 cm  
 FIP 7.738 ppm  
 F1 1926.47 Hz  
 F2P -0.343 ppm  
 F2 -85.88 Hz  
 FFCM 0.40406 ppm/cm  
 HSCM 101.06743 Hz/cm



$^1\text{H}$  NMR of (*R*)-4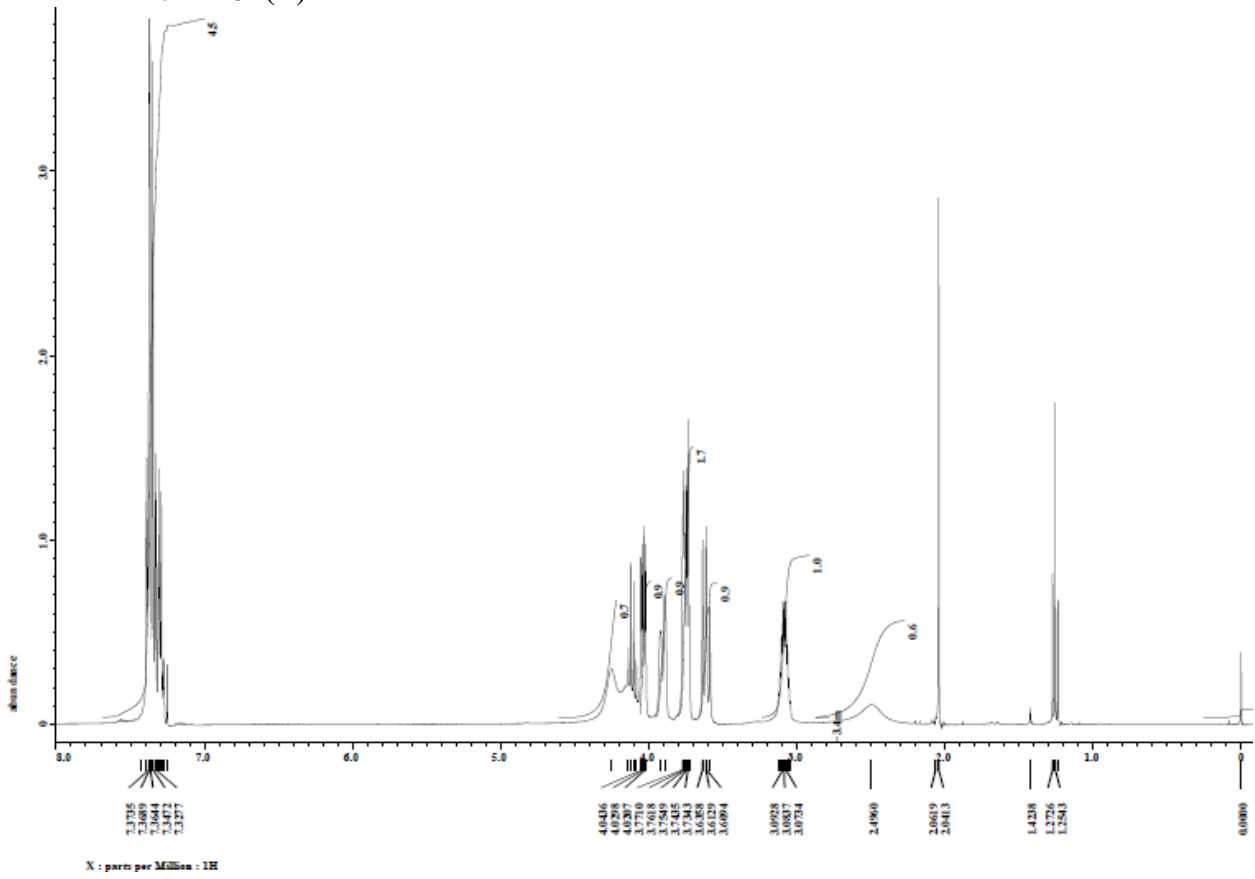 $^{13}\text{C}$  NMR of (*R*)-4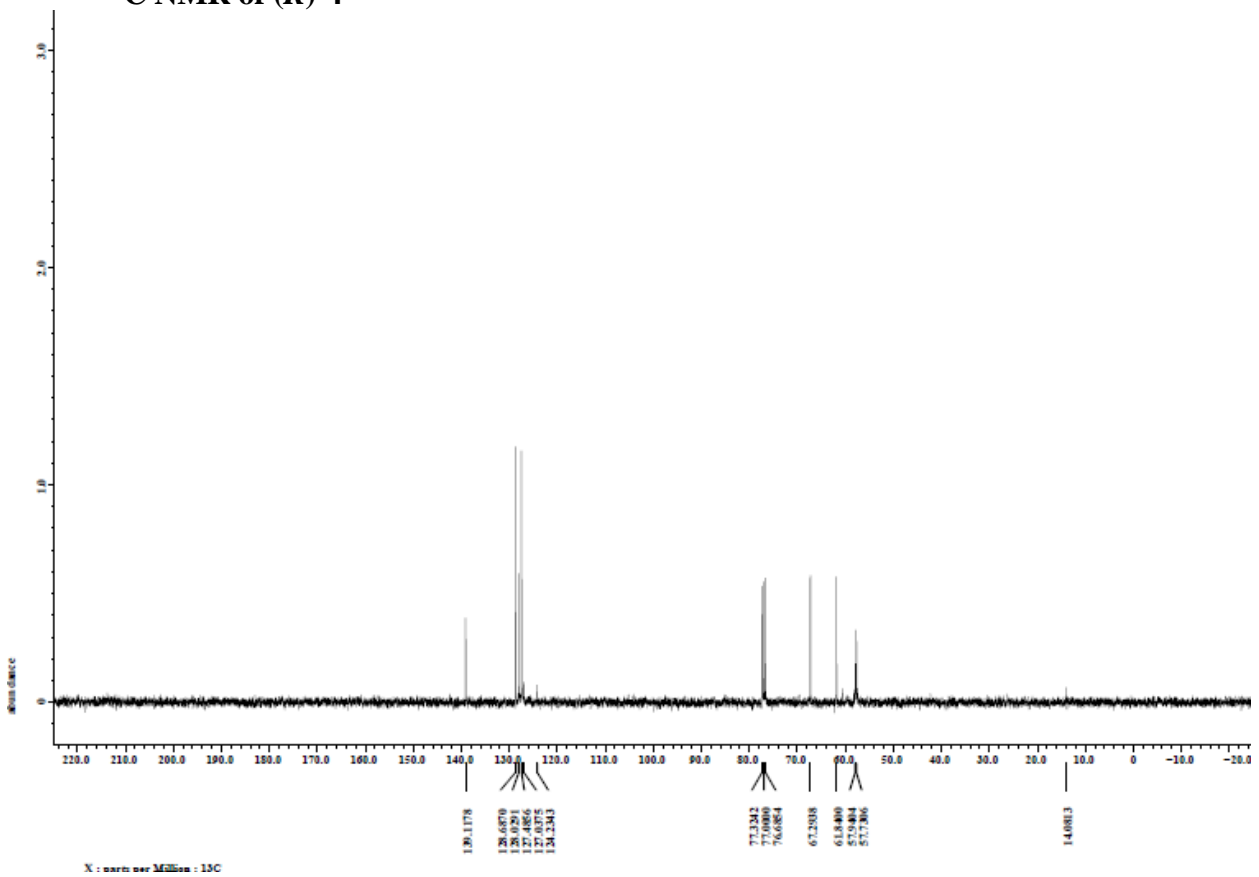

$^{19}\text{F}$  NMR of (*R*)-4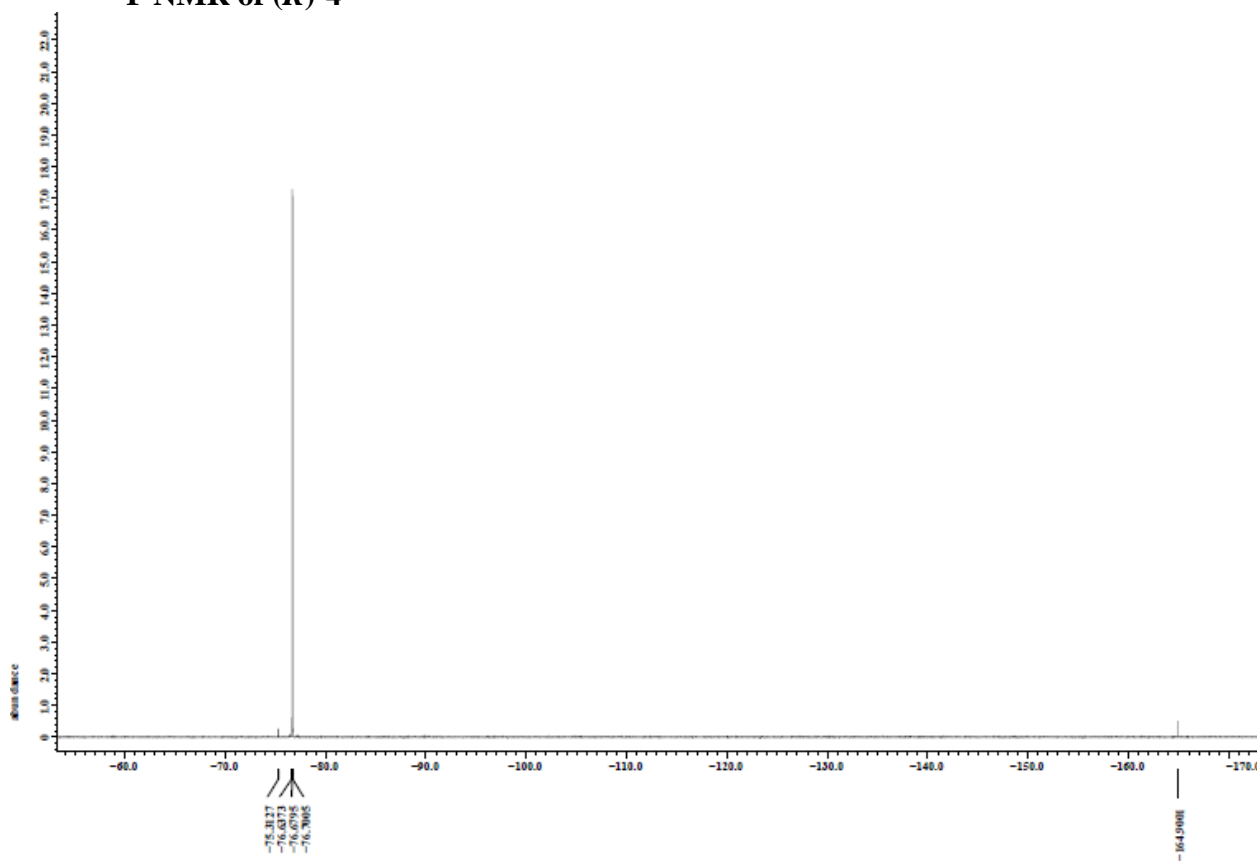 $^1\text{H}$  NMR of (*S*)-4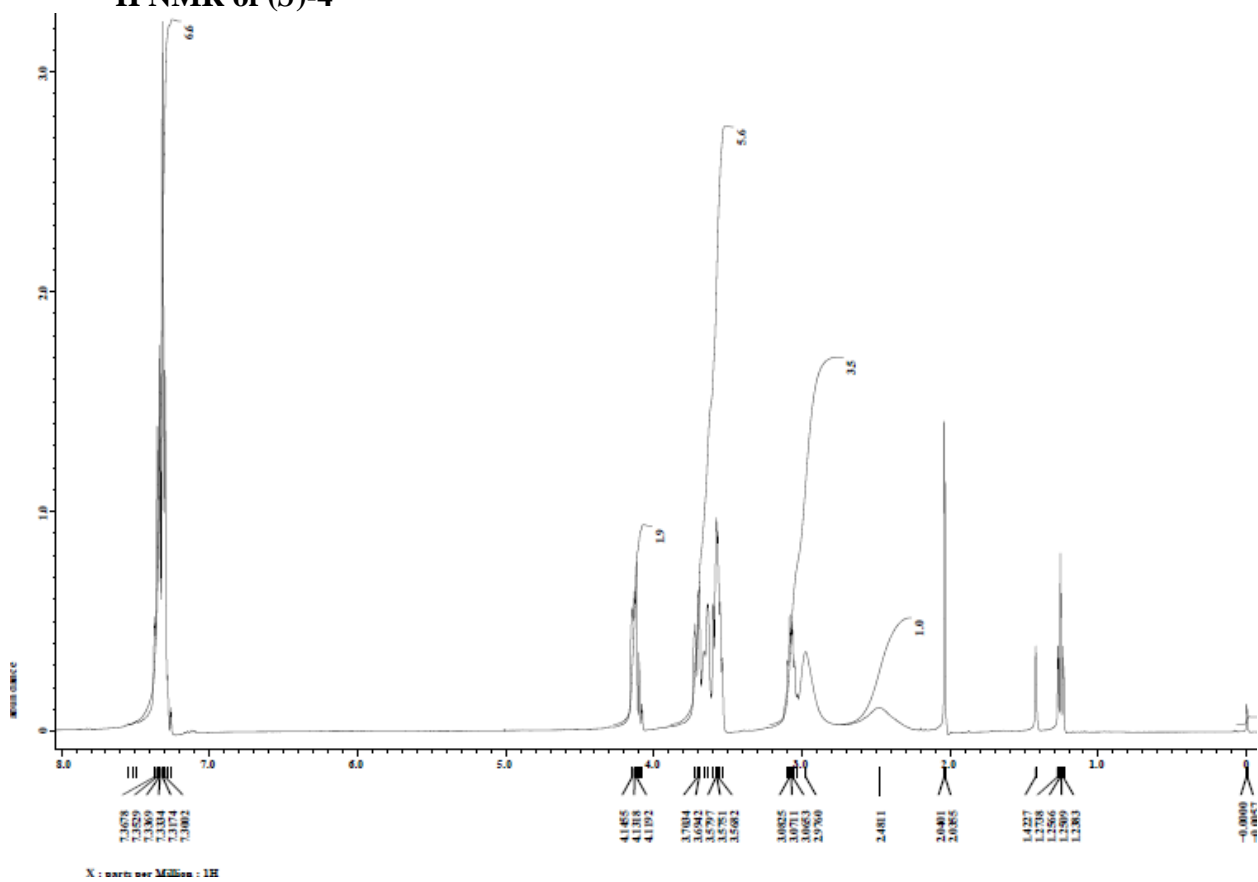

**$^{13}\text{C}$  NMR of (S)-4**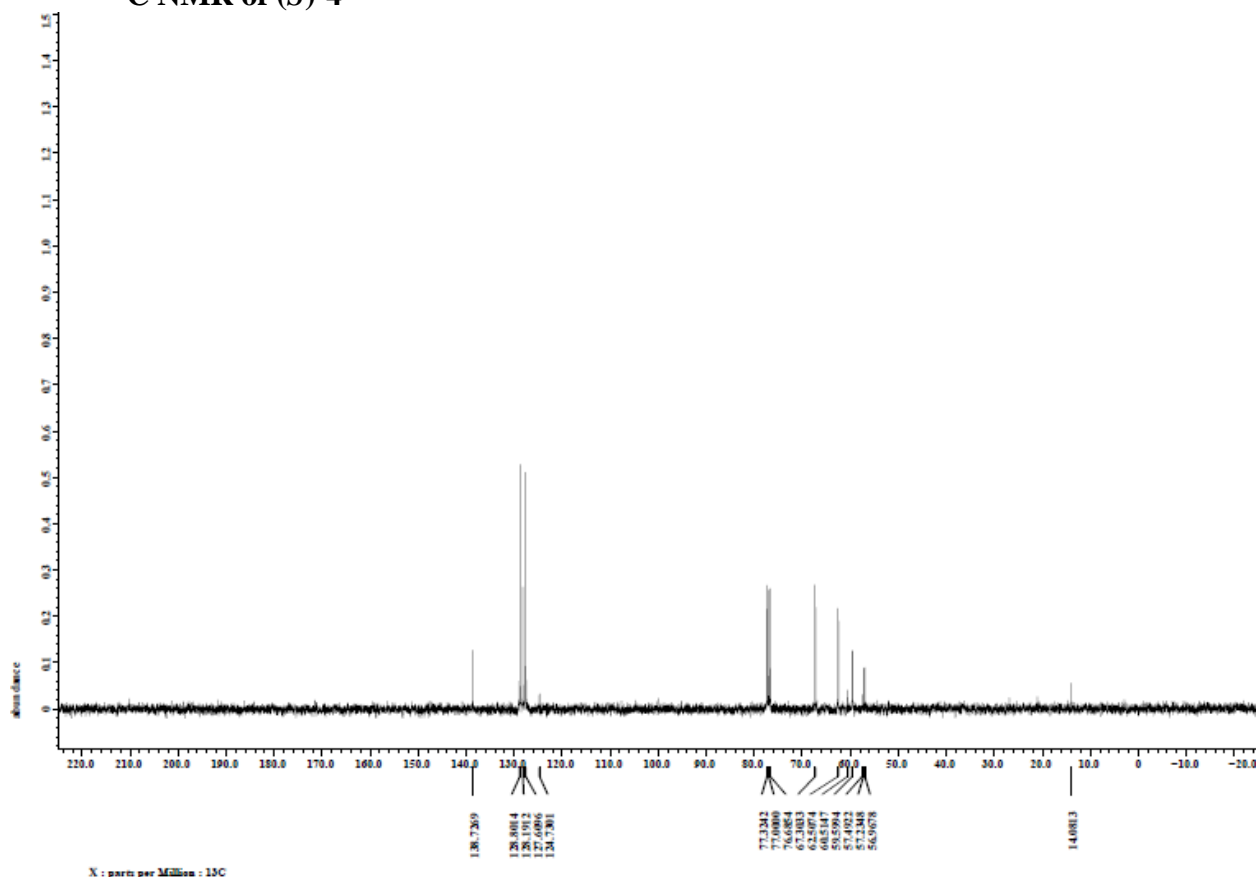 **$^{19}\text{F}$  NMR of (S)-4**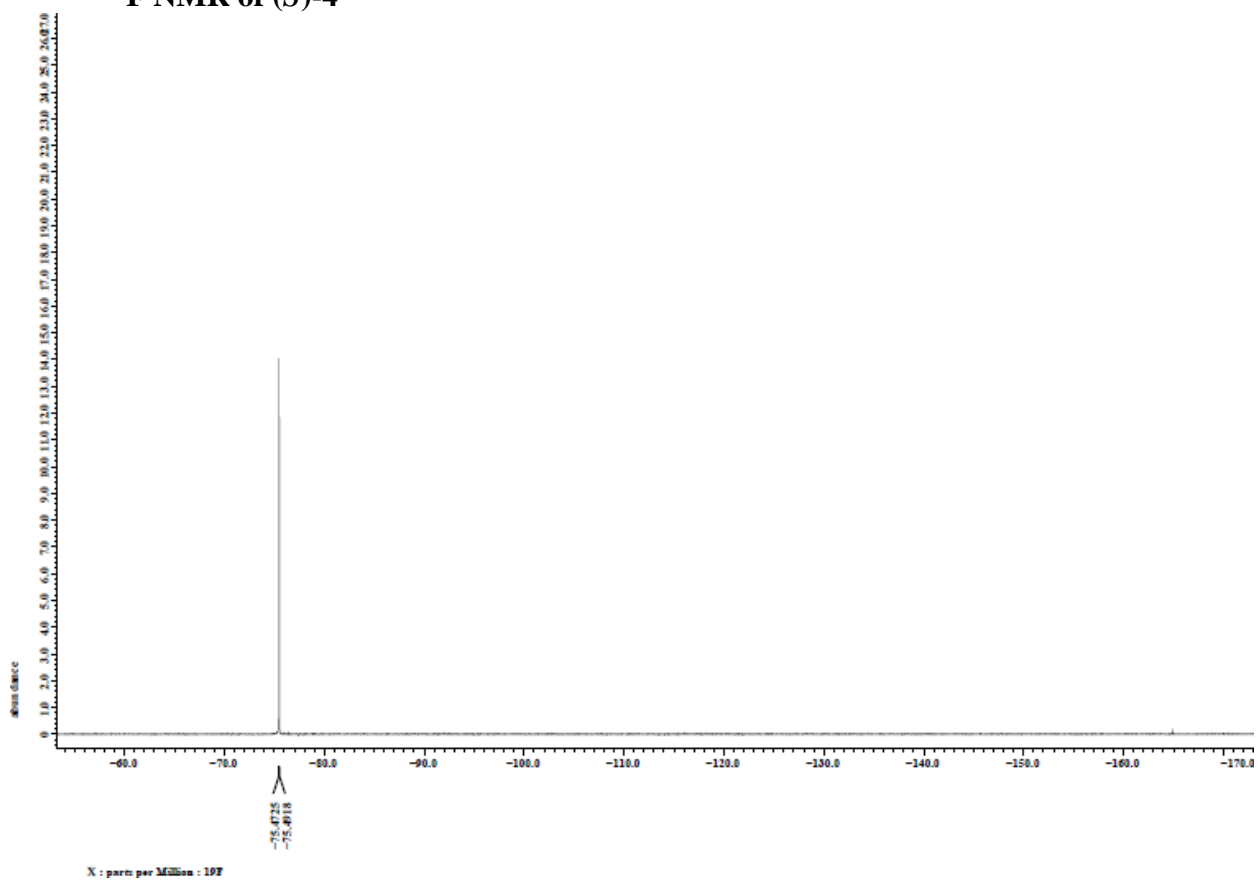

$^1\text{H}$  NMR of (*R*)-7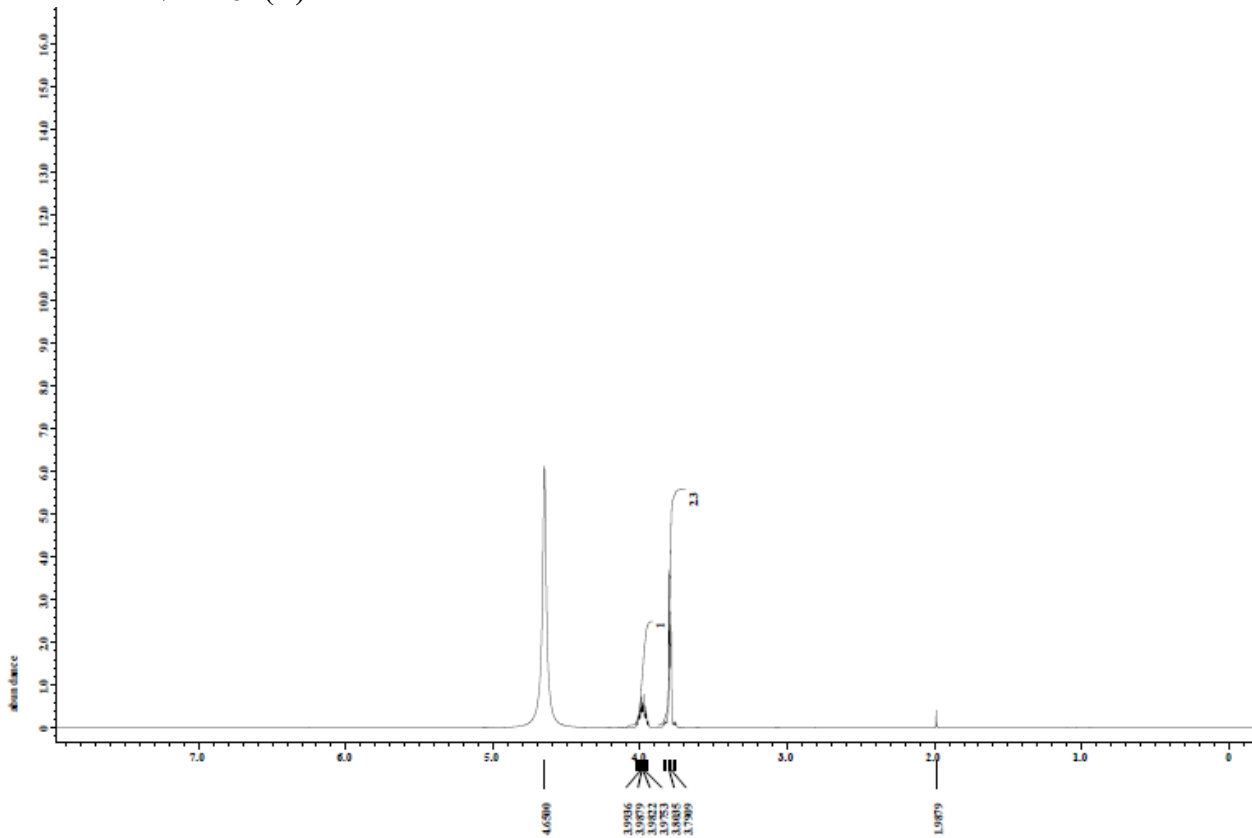

X : ppm per Million : 1H

 $^{13}\text{C}$  NMR of (*R*)-7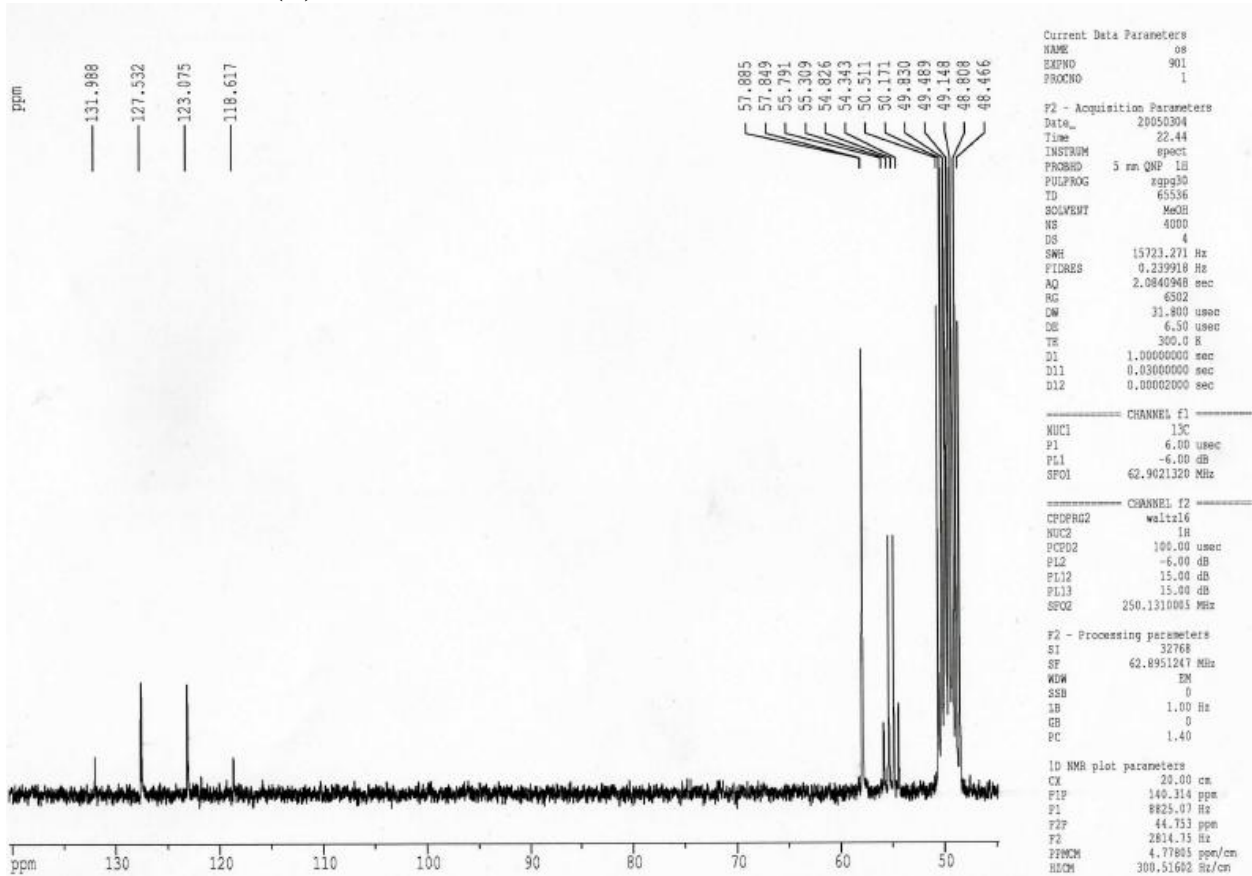



$^{19}\text{F}$  NMR of (*R*)-7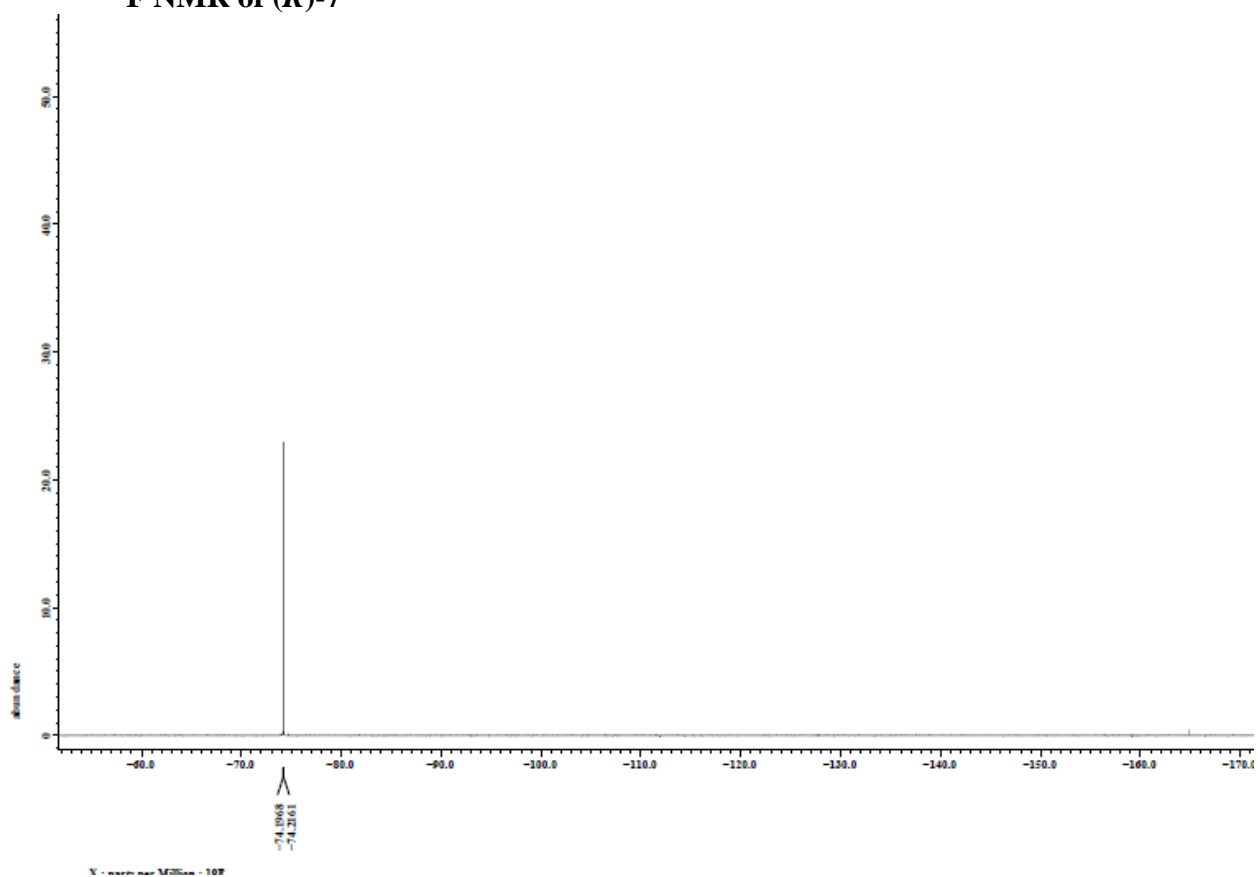

Supplement: c0ob00424c.pdf [file c0ob00424c.pdf]
